# Supplementary material
Source: publisher figshare collection journal article supplement (https://diabetesjournals.figshare.com/ndownloader/files/29052024)
Supplement: Supplementary file 1 [file 29052024]

## Sheet: Sheet1
Table S3 Characteristics of the clusters for each of the clusters and cohorts
Genetic data
Variable	SIDD			SIRD			MOD			MD			MDH
Cohort	DCS	GoDARTS	ANDIS	DCS	GoDARTS	ANDIS	DCS	GoDARTS	ANDIS	DCS	GoDARTS	ANDIS	DCS	GoDARTS	ANDIS
N	314	763	985	599	781	985	473	780	1459	750	1150	1992	519	807	865
%Males	58.6	60.29	67.31	62.1	50.83	67.31	49.05	63.33	57.09	55.6	59.04	60.54	53.95	49.19	57.23
Age (years)	57.83[52.12-63.94]	59.29[52.53-66.03]	58.05[50.77-65.18]	68.55[63.37-74]	67.95[62.52-73.25]	58.05[50.77-65.18]	53.12[48-58.59]	50.87[45.29-55.95]	51.11[45.55-56.41]	54.76[49.67-60.03]	61.48[55.42-67.23]	67.19[61.47-72.71]	66.24[61.01-71.45]	69.19[63.7-74.55]	68.04[63.14-74.23]
BMI (kg/m2)	29.09[26.12-31.76]	29.31[26.2-32.15]	28.75[25.74-31.64]	29.96[27.4-32.2]	32.04[28.9-35.1]	28.75[25.74-31.64]	38.04[34.9-40]	39.63[34.7-43.3]	36.21[32.41-39.2]	28.94[26.7-31.2]	29.6[26.7-32.3]	29.29[26.81-31.56]	27.02[24.67-29]	28.99[25.95-31.6]	27.26[24.48-29.8]
HbA1c (%)	10.5[9.5-11.5]	11.6[10.4-12.6]	10.7[9.5-12.1]	6.6[6.1-7]	7.6[6.7-8.1]	10.7[9.5-12.1]	7.1[6.3-7.6]	8.1[6.9-9]	7.5[6.4-8.2]	6.6[6.1-7.1]	7.4[6.7-8]	6.9[6.2-7.2]	6.5[5.9-6.8]	7.4[6.6-7.9]	6.9[6.1-7.1]
HbA1c (mmol/mol)	91.5[80.33-101.78]	103.39[90-114]	93.73[80-108.75]	48.91[43.17-53.01]	59.12[50-65]	93.73[80-108.75]	53.86[45.36-59.57]	64.9[52-75]	58.02[46-66]	49[43-54.1]	57.92[50-64]	52.1[44-55.11]	47.58[41-51]	57.58[49-63]	51.89[43-54]
C-peptide (nmol/L)	0.85[0.61-1.08]	1.75[1.18-2.26]	0.95[0.67-1.2]	1.46[1.13-1.7]	3.47[2.87-3.88]	0.95[0.67-1.2]	1.43[1.11-1.69]	1.98[1.43-2.47]	1.37[1.1-1.63]	0.87[0.72-1.04]	1.58[1.15-1.99]	1.19[0.93-1.4]	0.82[0.63-0.99]	1.72[1.22-2.14]	0.96[0.7-1.1]
HDL (mmol/L)	1.14[0.94-1.31]	1.16[0.97-1.29]	1.09[0.88-1.3]	1.1[0.95-1.24]	1.11[0.96-1.25]	1.09[0.88-1.3]	1.07[0.9-1.22]	1.06[0.9-1.21]	1.06[0.87-1.2]	1.11[0.96-1.25]	1.07[0.94-1.2]	1.13[0.97-1.3]	1.61[1.4-1.78]	1.61[1.4-1.78]	1.76[1.5-1.9]
LDL (mmol/L)	3.18[2.4-3.7]	2.69[1.92-3.3]	3.38[2.6-4.1]	2.83[2.1-3.5]	2.46[1.73-3.04]	3.38[2.6-4.1]	2.95[2.3-3.5]	2.68[1.95-3.34]	3.26[2.6-3.9]	3.08[2.3-3.8]	2.67[1.94-3.28]	3.11[2.3-3.8]	3.1[2.3-3.7]	2.52[1.77-3.13]	3.02[2.3-3.7]
Triglycerides (mmol/L)	2.27[1.3-2.41]	3.26[1.63-3.51]	2.55[1.3-2.7]	2.02[1.34-2.4]	2.8[1.77-3.29]	2.55[1.3-2.7]	2.18[1.42-2.6]	3.17[1.77-3.75]	2.42[1.4-2.7]	1.97[1.3-2.4]	2.77[1.6-3.25]	1.86[1.2-2.3]	1.33[0.9-1.6]	1.93[1.21-2.24]	1.24[0.9-1.5]
Glucose lowering	93.66	83.55	87.11	60.38	34.4	87.11	75.31	48.45	83.1	69.7	33.86	73.77	61	28.54	72.29
Metabolomics
Variable	SIDD			SIRD			MOD			MD			MDH
Cohort	DCS	GoDARTS	ANDIS	DCS	GoDARTS	ANDIS	DCS	GoDARTS	ANDIS	DCS	GoDARTS	ANDIS	DCS	GoDARTS	ANDIS
N	102	155	106	320	159	92	236	174	203	327	205	278	245	201	142
%Males	57.84	64.52	65.09	63.75	50.94	67.39	51.27	55.75	56.65	51.68	58.05	57.19	53.47	55.72	54.23
Age (years)	61.45[56.52-65.74]	59.42[52.07-67.22]	58.37[52.97-64.24]	71.39[65.83-77.21]	68.3[62.39-73.49]	66.24[62.29-71.37]	56.25[50.55-62.48]	51.98[45.87-58.18]	51.61[45.58-58.11]	58.1[52.42-63.77]	61.89[55.67-68.35]	67.78[62.34-73.29]	69.54[64.73-74.43]	69.22[63.03-75.52]	67.55[62.66-73.6]
BMI (kg/m2)	29.38[26.6-32.53]	29.95[26.9-33.1]	29.04[26.94-31.86]	29.87[27.48-32.2]	32.53[29-35.75]	34.8[30.79-38.29]	37.65[34.2-39.7]	40.51[35.73-44.08]	36.62[32.76-39.61]	28.4[26.2-30.3]	30.16[27.2-33.1]	29.66[27.33-31.62]	26.92[24.3-29]	29.53[26.4-32.1]	27.36[24.6-30.11]
HbA1c (%)	6.8[6.2-7.1]	7.8[6.6-8.5]	10.4[9.3-11.5]	6.4[6-6.7]	7[6.3-7.4]	7.3[6.4-7.6]	6.6[6-7]	7.4[6.5-8]	7.5[6.4-8.2]	6.4[5.9-6.6]	7.1[6.4-7.5]	6.9[6.2-7.2]	6.3[5.9-6.5]	7[6.4-7.3]	6.6[5.8-6.8]
HbA1c (mmol/mol)	51.11[44.07-54.1]	61.27[49-69]	89.73[78.25-101.77]	46.82[42-50]	53.16[45-57]	56.8[46-59.5]	48.91[42-53.26]	57.61[48-64]	58.18[46-66]	46.39[40.99-49]	53.67[46-58]	51.79[44-55]	45.03[40.99-48]	53.12[46-56]	48.93[40.25-51]
C-peptide (nmol/L)	0.96[0.72-1.15]	1.86[1.29-2.41]	1.04[0.78-1.29]	1.45[1.14-1.71]	3.41[2.85-3.8]	2.49[2-2.7]	1.46[1.18-1.71]	2.1[1.4-2.73]	1.36[1.1-1.6]	0.92[0.77-1.06]	1.63[1.21-2.01]	1.19[0.97-1.44]	0.82[0.65-0.98]	1.72[1.25-2.14]	0.91[0.66-1.1]
HDL (mmol/L)	1.21[0.99-1.33]	1.28[1.06-1.42]	1.1[0.9-1.3]	1.11[0.96-1.25]	1.17[0.99-1.33]	1.03[0.88-1.2]	1.11[0.93-1.27]	1.2[1-1.37]	1.09[0.9-1.2]	1.18[0.98-1.35]	1.22[1.02-1.37]	1.16[1-1.3]	1.62[1.36-1.85]	1.63[1.4-1.81]	1.77[1.5-2]
LDL (mmol/L)	2.62[1.8-3.18]	2.15[1.66-2.68]	3.38[2.5-4.27]	2.44[1.9-2.9]	2.02[1.41-2.54]	2.95[2.2-3.8]	2.48[1.8-3.1]	2.22[1.73-2.7]	3.25[2.6-3.8]	2.73[1.9-3.4]	2.26[1.7-2.8]	3.18[2.46-3.9]	2.62[2-3.2]	2.05[1.56-2.42]	3[2.4-3.5]
Triglycerides (mmol/L)	1.63[1.1-1.92]	2.23[1.44-2.74]	2.44[1.5-3]	1.91[1.29-2.34]	2.7[1.79-3.16]	2.45[1.58-2.9]	2.18[1.48-2.56]	2.62[1.62-3.07]	2.57[1.3-2.55]	1.76[1.19-2.1]	2.27[1.49-2.78]	1.86[1.2-2.1]	1.29[0.87-1.53]	1.89[1.15-2.18]	1.18[0.8-1.4]
Glucose lowering	92.16	84		74.68	54.68	68.48	85.65	70.75	83.25	80.66	50.26	64.03	67.25	38.04	55.32
Lipidomics
Variable	SIDD			SIRD			MOD			MD			MDH
Cohort	DCS	GoDARTS	ANDIS	DCS	GoDARTS	ANDIS	DCS	GoDARTS	ANDIS	DCS	GoDARTS	ANDIS	DCS	GoDARTS	ANDIS
N	57	155	106	239	159	92	165	175	199	221	207	280	195	200	143
%Males	52.63	64.52	64.15	67.78	50.94	67.39	51.52	56	56.28	51.58	57.97	56.79	52.31	55.5	54.55
Age (years)	61.28[56.28-67.58]	59.42[52.07-67.22]	58.27[52.97-64.2]	70.71[64.97-76.68]	68.3[62.39-73.49]	66.24[62.29-71.37]	55.88[50.33-62.37]	51.94[45.87-58.13]	51.78[45.92-58.12]	57.21[52.15-62.66]	61.86[55.78-68.34]	67.77[62.37-73.22]	69.37[64.55-74.11]	69.24[62.93-75.53]	67.57[62.73-73.57]
BMI (kg/m2)	29.48[26.5-33]	29.95[26.9-33.1]	29.02[26.84-31.86]	29.79[27.55-31.75]	32.53[29-35.75]	34.8[30.79-38.29]	37.58[34.5-39.7]	40.54[35.75-44.15]	36.58[32.72-39.53]	28.25[26.1-30.2]	30.17[27.2-33.1]	29.65[27.33-31.64]	26.84[24.1-29.05]	29.53[26.37-32.12]	27.38[24.63-30.28]
HbA1c (%)	7[6.3-7.2]	7.8[6.6-8.5]	10.4[9.4-11.5]	6.4[6-6.7]	7[6.3-7.4]	7.3[6.4-7.6]	6.7[6-7]	7.4[6.5-8]	7.4[6.3-8.1]	6.4[5.9-6.6]	7.1[6.4-7.5]	6.9[6.2-7.2]	6.2[5.8-6.5]	7[6.4-7.3]	6.6[5.9-6.8]
HbA1c (mmol/mol)	52.46[45-55]	61.27[49-69]	90.2[79.25-102]	46.45[42-49.73]	53.16[45-57]	56.8[46-59.5]	49.27[42-53]	57.59[48-64]	57.85[45.5-65.5]	46.8[41-49]	53.61[46-58]	51.76[44-55]	44.47[40-47.77]	53.13[46-56]	48.88[40.5-51]
C-peptide (nmol/L)	1[0.78-1.14]	1.86[1.29-2.41]	1.04[0.78-1.29]	1.44[1.13-1.69]	3.41[2.85-3.8]	2.49[2-2.7]	1.46[1.15-1.72]	2.09[1.4-2.73]	1.36[1.1-1.6]	0.94[0.77-1.06]	1.64[1.21-2]	1.19[0.97-1.44]	0.83[0.66-0.99]	1.72[1.25-2.12]	0.91[0.66-1.1]
HDL (mmol/L)	1.22[0.98-1.33]	1.28[1.06-1.42]	1.1[0.9-1.3]	1.11[0.97-1.25]	1.17[0.99-1.33]	1.03[0.88-1.2]	1.09[0.92-1.24]	1.2[1-1.37]	1.09[0.9-1.2]	1.17[0.98-1.33]	1.22[1.02-1.37]	1.16[1-1.3]	1.63[1.38-1.84]	1.63[1.4-1.81]	1.77[1.5-2]
LDL (mmol/L)	2.55[1.7-3.2]	2.15[1.66-2.68]	3.38[2.5-4.27]	2.44[1.9-2.9]	2.02[1.41-2.54]	2.95[2.2-3.8]	2.53[1.9-3.1]	2.22[1.73-2.7]	3.26[2.65-3.8]	2.8[2-3.4]	2.27[1.7-2.81]	3.18[2.49-3.9]	2.67[2.1-3.3]	2.05[1.56-2.42]	2.99[2.4-3.5]
Triglycerides (mmol/L)	1.65[1.07-2.07]	2.23[1.44-2.74]	2.43[1.5-3]	1.88[1.26-2.29]	2.7[1.79-3.16]	2.45[1.58-2.9]	2.25[1.52-2.72]	2.62[1.6-3.07]	2.36[1.3-2.5]	1.8[1.2-2.21]	2.26[1.48-2.77]	1.87[1.2-2.1]	1.3[0.88-1.53]	1.79[1.15-2.13]	1.18[0.8-1.4]
Glucose lowering	100	84		71.49	54.68	68.48	82.58	70.95	83.42	79.9	50.26	63.93	65.56	38.25	54.93
Peptidomics
Variable	SIDD			SIRD			MOD			MD			MDH
Cohort	DCS	GoDARTS		DCS	GoDARTS		DCS	GoDARTS		DCS	GoDARTS		DCS	GoDARTS
N	40	104		162	112		100	125		144	129		127	127
%Males	57.5	65.38		64.2	53.57		49	58.4		54.86	58.14		55.12	60.63
Age (years)	60.82[57-67.31]	60.17[52.83-67.33]		70.79[64.5-77.77]	67.58[62.04-72.65]		55.19[49.83-62.2]	52.16[45.87-59.03]		55.67[50.91-61.2]	60.4[54.36-65.96]		69.15[64.32-73.77]	69.34[63.13-75.57]
BMI (kg/m2)	29.05[25.9-31]	29.51[26.6-32.32]		30.04[27.63-32.27]	32.02[28.7-35.2]		37.44[34.5-39.52]	40.57[35.8-44.3]		28.43[26.2-30.52]	29.74[27.1-32.8]		27.06[24.15-29.6]	29.08[26.25-31.9]
HbA1c (%)	6.9[6.3-7]	7.7[6.6-8.6]		6.4[6-6.7]	7.1[6.4-7.5]		6.7[6-7]	7.3[6.4-7.8]		6.4[5.9-6.6]	7.1[6.5-7.5]		6.2[5.9-6.5]	7[6.5-7.3]
HbA1c (mmol/mol)	52.45[45.27-53.5]	60.97[49-70]		46.59[42-49.93]	54.12[46-58]		49.47[42-53]	56.66[46-62]		46.06[40.99-49]	53.65[48-58]		44.45[40.99-47.27]	52.79[48-56]
C-peptide (nmol/L)	1.02[0.78-1.13]	1.9[1.3-2.38]		1.44[1.12-1.69]	3.46[2.91-3.8]		1.44[1.14-1.68]	2.16[1.43-2.8]		0.94[0.78-1.08]	1.62[1.21-1.97]		0.83[0.66-0.99]	1.75[1.25-2.2]
HDL (mmol/L)	1.21[1-1.33]	1.29[1.09-1.44]		1.11[0.97-1.23]	1.19[1.01-1.33]		1.06[0.91-1.22]	1.18[1-1.33]		1.14[0.96-1.31]	1.18[1.01-1.31]		1.63[1.34-1.86]	1.6[1.36-1.79]
LDL (mmol/L)	2.56[1.7-3.1]	2.14[1.67-2.68]		2.44[1.9-2.9]	2.1[1.54-2.56]		2.63[1.9-3.2]	2.18[1.73-2.7]		2.88[2-3.52]	2.4[1.77-3.01]		2.66[2.15-3.35]	2.12[1.58-2.55]
Triglycerides (mmol/L)	1.62[1.06-2.01]	2.23[1.48-2.75]		1.93[1.34-2.27]	2.63[1.75-3.2]		2.29[1.52-2.85]	2.53[1.58-3.03]		1.85[1.18-2.25]	2.31[1.5-2.79]		1.28[0.9-1.5]	1.92[1.13-1.97]
Glucose lowering	100	83.56		70.89	51		83.87	70.09		81.06	49.17		64.41	36.36
